# Supplementary material
Source: MDPI journal article supplement (https://www.mdpi.com/2073-4468/12/4/72)
Supplement: s1 [file s1]

# Trends in the development of antibody-drug conjugates for cancer therapy

## Supplementary Materials

**Table S1. List of ADC Research Articles**

|   | Title                                                                                                                                                           | Linker        | disease                                             | Payload                    | Target antigen | Year |
|---|-----------------------------------------------------------------------------------------------------------------------------------------------------------------|---------------|-----------------------------------------------------|----------------------------|----------------|------|
| 1 | Peroxide-cleavable linkers for antibody–drug conjugates                                                                                                         | cleavable     | breast cancer                                       | MMAE                       | HER2, pd-L1    | 2023 |
| 2 | Antibody–Drug Conjugate Sacituzumab Govitecan Drives Efficient Tissue Penetration and Rapid Intracellular Drug Release                                          | cleavable     | gastric carcinoma                                   | Topoisomerase 1 inhibitor  | Trop-2         | 2023 |
| 3 | An anti-EGFR antibody-drug conjugate overcomes resistance to HER2-targeted drugs                                                                                | cleavable     | breast cancer                                       | DM1                        | HER2           | 2023 |
| 4 | Targeting CD74 in B-cell non-Hodgkin lymphoma with the antibody-drug conjugate STRO-001                                                                         | non-cleavable | b-cell non-Hodgkin's lymphoma                       | Maytansinoid               | CD74           | 2023 |
| 5 | Preclinical Evaluation of 9MW2821, a Site-Specific Monomethyl Auristatin E–based Antibody–Drug Conjugate for Treatment of Nectin-4–expressing Cancers           | cleavable     | urinary tract carcinoma                             | MMAE                       | Nectin-4       | 2023 |
| 6 | SGN-CD228A Is an Investigational CD228-Directed Antibody–Drug Conjugate with Potent Antitumor Activity across a Wide Spectrum of Preclinical Solid Tumor Models | cleavable     | melanoma, non-small cell lung cancer, breast cancer | MMAE                       | CD228          | 2023 |
| 7 | Preclinical Profile of BYON3521 Predicts an Effective and Safe MET Antibody–Drug Conjugate                                                                      | cleavable     | gastric carcinoma                                   | DNA-alkylating duocarmycin | c-MET          | 2023 |
| 8 | Trastuzumab deruxtecan (DS-8201a), a HER2-targeting antibody–drug conjugate with topoisomerase I inhibitor payload, shows antitumor                             | cleavable     | cervical cancer, ovarian cancer                     | Topoisomerase 1 inhibitor  | HER2           | 2023 |

|    |                                                                                                                                                                   |           |                                                  |                           |        |      |
|----|-------------------------------------------------------------------------------------------------------------------------------------------------------------------|-----------|--------------------------------------------------|---------------------------|--------|------|
|    | activity in uterine and ovarian carcinosarcoma with HER2/neu expression                                                                                           |           |                                                  |                           |        |      |
| 9  | Epigenetically upregulating TROP2 and SLFN11 enhances therapeutic efficacy of TROP2 antibody drug conjugate sacituzumab govitecan                                 | cleavable | breast cancer                                    | Topoisomerase 1 inhibitor | Trop-2 | 2023 |
| 10 | Abstract ND01: ABBV-319: A first-in-class Glucocorticoid Receptor Modulator (GRM) agonist ADC for the treatment of B-cell malignancies                            | cleavable | b-cell malignancy                                | GRM                       | CD19   | 2023 |
| 11 | A Novel Dual-Payload ADC for the Treatment of HER2+ Breast and Colon Cancer                                                                                       | cleavable | breast cancer, colorectal cancer                 | MMAE, DM1                 | HER2   | 2023 |
| 12 | Tumor Site-Specific Cleavage Improves the Antitumor Efficacy of Antibody-Drug Conjugates                                                                          | cleavable | breast cancer                                    | MMAE                      | HER2   | 2023 |
| 13 | Development of a MMAE-based antibody-drug conjugate targeting B7-H3 for glioblastoma                                                                              | cleavable | non-small cell lung cancer                       | MMAE                      | B7-H3  | 2023 |
| 14 | Abstract 6311: ABBV-400: An ADC delivering a novel topoisomerase 1 inhibitor to c-Met-positive solid tumors                                                       | cleavable | solid tumor                                      | Topoisomerase 1 inhibitor | c-met  | 2023 |
| 15 | A novel antibody-KSP inhibitor conjugate improves KSP inhibitor efficacy in vitro and in vivo                                                                     | cleavable | breast cancer, gastric mucosal epithelial cancer | KSP inhibitor             | HER2   | 2023 |
| 16 | Preclinical development of a B7-H3-targeting ADC with a novel DNA topoisomerase I inhibitor for solid tumors                                                      | cleavable | lung cancer, glioma, prostate cancer             | Topoisomerase 1 inhibitor | B7-H3  | 2023 |
| 17 | Development of Triple-negative breast cancer (TNBC) syngeneic models and TROP2-directed antibody-drug conjugate (ADC) surrogate to model therapeutic combinations | cleavable | breast cancer                                    | Topoisomerase 1 inhibitor | Trop-2 | 2023 |
| 18 | Targeting CD44 Variant 5 with an Antibody-Drug Conjugate Is an Effective Therapeutic Strategy for Intrahepatic Cholangiocarcinoma                                 | cleavable | cholangiocarcinoma                               | MMAE                      | CD44   | 2023 |
| 19 | B7-H3 as a Therapeutic Target                                                                                                                                     | cleavable | prostate cancer                                  | Topoisomerase 1           | B7-H3  | 2023 |

|    |                                                                                                                                                        |           |                                                                                                                 |                                                                                        |          |      |
|----|--------------------------------------------------------------------------------------------------------------------------------------------------------|-----------|-----------------------------------------------------------------------------------------------------------------|----------------------------------------------------------------------------------------|----------|------|
|    | in Advanced Prostate Cancer                                                                                                                            |           |                                                                                                                 | inhibitor                                                                              |          |      |
| 20 | The first ADC bearing the ferroptosis inducer RSL3 as a payload with conservation of the fragile electrophilic warhead                                 | cleavable | breast cancer                                                                                                   | RSL3                                                                                   | HER2     | 2022 |
| 21 | A FZD7-specific Antibody–Drug Conjugate Induces Ovarian Tumor Regression in Preclinical Models                                                         | cleavable | ovarian cancer                                                                                                  | MMAE                                                                                   | FZD7     | 2022 |
| 22 | Cellular-Resolution Imaging of Bystander Payload Tissue Penetration from Antibody-Drug Conjugates                                                      | cleavable | breast cancer                                                                                                   | MMAE, Ahx maytansine, DM1, Calicheamicin D, PBD, Exatecan, DXd, SN 38, Calicheamicin G | HER2     | 2022 |
| 23 | Preclinical Evaluation of IMGC936, a Next-Generation Maytansinoid-based Antibody–drug Conjugate Targeting ADAM9-expressing Tumors                      | cleavable | non-small cell lung cancer, pancreatic cancer, stomach cancer, breast cancer, ovarian cancer, colorectal cancer | DM21C                                                                                  | ADAM9    | 2022 |
| 24 | DS-7300a, a DNA Topoisomerase I Inhibitor, DXd-Based Antibody–Drug Conjugate Targeting B7-H3, Exerts Potent Antitumor Activities in Preclinical Models | cleavable | small cell lung cancer, esophageal cancer, endometrial cancer, prostate cancer, breast cancer                   | DXd                                                                                    | B7-H3    | 2022 |
| 25 | Overcoming Resistance to Anti–Nectin-4 Antibody-Drug Conjugate                                                                                         | cleavable | breast cancer                                                                                                   | MMAE                                                                                   | Nectin-4 | 2022 |
| 26 | EGFR Inhibition Enhances the Cellular Uptake and Antitumor-Activity of the HER3 Antibody–Drug Conjugate HER3–DXd                                       | cleavable | non-small cell lung cancer                                                                                      | MMAE                                                                                   | HER3     | 2022 |
| 27 | A CD45-targeted antibody-drug conjugate successfully conditions for allogeneic hematopoietic stem cell transplantation in mice                         | cleavable | blood cancer                                                                                                    | PBD                                                                                    | CD45     | 2022 |
| 28 | Monomethyl auristatin antibody and peptide drug conjugates for trimodal cancer chemo-radio-immunotherapy                                               | cleavable | head and neck cancer, lung cancer, melanoma, colorectal cancer                                                  | MMAE                                                                                   | HER3     | 2022 |

|    |                                                                                                                                                                                                        |                          |                                                                                                   |                                  |                    |      |
|----|--------------------------------------------------------------------------------------------------------------------------------------------------------------------------------------------------------|--------------------------|---------------------------------------------------------------------------------------------------|----------------------------------|--------------------|------|
| 29 | CUB Domain-Containing Protein 1 (CDCP1) is a rational target for the development of imaging tracers and antibody-drug conjugates for cancer detection and therapy                                      | cleavable                | kidney cancer, colorectal cancer, lung cancer, ovarian cancer, pancreatic cancer, prostate cancer | MMAE                             | CDCP1              | 2022 |
| 30 | Targeting LRRC15 Inhibits Metastatic Dissemination of Ovarian Cancer                                                                                                                                   | cleavable                | ovarian cancer                                                                                    | MMAE                             | LRRC15             | 2022 |
| 31 | ABBV-011, A Novel, Calicheamicin-Based Antibody–Drug Conjugate, Targets SEZ6 to Eradicate Small Cell Lung Cancer Tumors                                                                                | cleavable                | small cell lung cancer                                                                            | Calicheamicin                    | SEZ6               | 2022 |
| 32 | Exploiting LRRC15 as a Novel Therapeutic Target in Cancer                                                                                                                                              | cleavable                | pancreatic cancer, breast cancer, sarcoma, ovarian cancer                                         | MMAE                             | LRRC15             | 2022 |
| 33 | Patritumab deruxtecan (HER3-DXd), a novel HER3 directed antibody drug conjugate, exhibits in vitro activity against breast cancer cells expressing HER3 mutations with and without HER2 overexpression | cleavable                | breast cancer                                                                                     | DXd                              | HER3               | 2022 |
| 34 | EpCAM- and EGFR-Specific Antibody Drug Conjugates for Triple-Negative Breast Cancer Treatment                                                                                                          | cleavable                | breast cancer                                                                                     | MMAE                             | EGFR, EpCAM        | 2022 |
| 35 | A Novel NAMPT Inhibitor-Based Antibody–Drug Conjugate Payload Class for Cancer Therapy                                                                                                                 | cleavable, non-cleavable | colorectal cancer, breast cancer, ovarian cancer                                                  | NAMPTi                           | LYPD3, HER2, B7-H3 | 2022 |
| 36 | Antibody-Drug Conjugate Targeting c-Kit for the Treatment of Small Cell Lung Cancer                                                                                                                    | non-cleavable            | small cell lung cancer                                                                            | DM1                              | c-Kit              | 2022 |
| 37 | Antibody drug conjugates, targeting cancer-expressed EGFR, exhibit potent and specific antitumor activity                                                                                              | cleavable, non-cleavable | epithelial cancer, non-small cell lung cancer, colorectal cancer, head and neck cancer            | MMAE, DXd1, SN-38, Tesirine, DM1 | EGFR               | 2022 |
| 38 | Therapeutic effect of a MUC1-specific monoclonal antibody-drug conjugates against pancreatic cancer model                                                                                              | cleavable                | pancreatic cancer                                                                                 | MMAE                             | MUC1               | 2022 |

|    |                                                                                                                                                                         |                          |                                                                                           |              |              |      |
|----|-------------------------------------------------------------------------------------------------------------------------------------------------------------------------|--------------------------|-------------------------------------------------------------------------------------------|--------------|--------------|------|
| 39 | A Novel Antibody-Drug Conjugate Targeting Nectin-2 Suppresses Ovarian Cancer Progression in Mouse Xenograft Models                                                      | non-cleavable            | ovarian cancer                                                                            | DM1          | Nectin-2     | 2022 |
| 40 | A novel anti-c-Kit antibody–drug conjugate to treat wild-type and activating-mutant c-Kit-positive tumors                                                               | non-cleavable            | gastrointestinal stromal tumors, small cell lung cancer                                   | DM1          | c-Kit        | 2022 |
| 41 | HER2-Targeted Antibody–Drug Conjugates Display Potent Antitumor Activities in Preclinical Extramammary Paget’s Disease Models: In Vivo and Immunohistochemical Analyses | cleavable, non-cleavable | Paget's disease of the breast                                                             | DXd, DM1     | HER2         | 2022 |
| 42 | EGFR binding Fc domain-drug conjugates: stable and highly potent cytotoxic molecules mediate selective cell killing                                                     | cleavable                | small cell lung cancer, head and neck cancer, colon cancer, pancreatic cancer             | MMAE         | EGFR         | 2022 |
| 43 | Fcγ Receptor-Dependent Internalization and Off-Target Cytotoxicity of Antibody-Drug Conjugate Aggregates                                                                | cleavable, non-cleavable | breast cancer                                                                             | DXd, DM1     | HER2         | 2022 |
| 44 | Lipolysis-stimulated lipoprotein receptor-targeted antibody-drug conjugate demonstrates potent antitumor activity against epithelial ovarian cancer                     | cleavable                | ovarian cancer                                                                            | MMAE         | LSR          | 2022 |
| 45 | Physicochemical and biological impact of metal-catalyzed oxidation of IgG1 monoclonal antibodies and antibody-drug conjugates via reactive oxygen species               | non-cleavable, cleavable | breast cancer, stomach cancer, ovarian cancer, non-small cell lung cancer, thyroid cancer | DM1, MMAE    | HER2, NaPi2b | 2022 |
| 46 | All-in-one disulfide bridging enables the generation of antibody conjugates with modular cargo loading                                                                  | cleavable                | breast cancer                                                                             | MMAE         | HER2         | 2022 |
| 47 | Biological Evaluation of Maytansinoid-Based Site-Specific Antibody-Drug Conjugate Produced by Fully Chemical Conjugation Approach: AJICAP®                              | cleavable                | breast cancer                                                                             | Maytansinoid | HER2         | 2022 |
| 48 | High-throughput membrane-                                                                                                                                               | cleavable                | esophageal                                                                                | MMAE         | PIEZO1       | 2022 |

|    |                                                                                                                                                          |           |                                                                                                                                    |               |               |      |
|----|----------------------------------------------------------------------------------------------------------------------------------------------------------|-----------|------------------------------------------------------------------------------------------------------------------------------------|---------------|---------------|------|
|    | anchored proteome screening reveals PIEZO1 as a promising antibody-drug target for human esophageal squamous cell carcinoma                              |           | cancer                                                                                                                             |               |               |      |
| 49 | Evaluation of the DLL3-targeting Antibody-Drug Conjugate Rovalpituzumab Tesirine in Preclinical Models of Neuroblastoma                                  | cleavable | neuroblastoma                                                                                                                      | PBD dimer     | DLL3          | 2022 |
| 50 | Preclinical Development of ADCT-601, a Novel Pyrrolobenzodiazepine Dimer-based Antibody-drug Conjugate Targeting AXL-expressing Cancers                  | cleavable | non-small cell lung cancer, Acute myeloid leukemia, melanoma, ovarian cancer, kidney cancer, pancreatic cancer, esophageal cancer, | PBD dimer     | AXL           | 2022 |
| 51 | Enapotamab Vedotin, an AXL-Specific Antibody-Drug Conjugate, Demonstrates Antitumor Efficacy in Patient-Derived Xenograft Models of Soft Tissue Sarcoma  | cleavable | melanoma, pancreatic cancer, cervical cancer                                                                                       | MMAE          | AXL           | 2022 |
| 52 | GSK3 inhibitor enhances gemtuzumab ozogamicin-induced apoptosis in primary human leukemia cells by overcoming multiple mechanisms of resistance          | cleavable | breast cancer                                                                                                                      | Calicheamicin | CD33          | 2022 |
| 53 | Discovery of ABBV-3373, an Anti-TNF Glucocorticoid Receptor Modulator Immunology Antibody Drug Conjugate                                                 | cleavable | breast cancer, non-small cell lung cancer                                                                                          | GRM           | $\alpha$ -TNF | 2022 |
| 54 | Antibody-drug conjugates with dual payloads for combating breast tumor heterogeneity and drug resistance                                                 | cleavable | breast cancer                                                                                                                      | MMAE, MMAF    | HER2          | 2021 |
| 55 | Datopotamab Deruxtecan, a Novel TROP2-directed Antibody-drug Conjugate, Demonstrates Potent Antitumor Activity by Efficient Drug Delivery to Tumor Cells | cleavable | melanoma                                                                                                                           | DXd           | Trop-2        | 2021 |
| 56 | Improving Antibody-Tubulysin Conjugates through Linker                                                                                                   | cleavable | leukemia                                                                                                                           | Tubulysin M   | CD30          | 2021 |

|    |                                                                                                                                                |               |                                                                               |                           |                    |      |
|----|------------------------------------------------------------------------------------------------------------------------------------------------|---------------|-------------------------------------------------------------------------------|---------------------------|--------------------|------|
|    | Chemistry and Site-Specific Conjugation                                                                                                        |               |                                                                               |                           |                    |      |
| 57 | Calicheamicin Antibody–Drug Conjugates with Improved Properties                                                                                | not used      | Acute myeloid leukemia                                                        | Calicheamicin             | CD30, CD22         | 2021 |
| 58 | Tandem-Cleavage Linkers Improve the In Vivo Stability and Tolerability of Antibody–Drug Conjugates                                             | cleavable     | chronic lymphocytic leukemia                                                  | MMAE                      | CD79b              | 2021 |
| 59 | Novel antibody-drug conjugate with UV-controlled cleavage mechanism for cytotoxin release                                                      | cleavable     | breast cancer, gastric carcinoma                                              | MMAE                      | HER2               | 2021 |
| 60 | Exatecan Antibody Drug Conjugates Based on a Hydrophilic Polysarcosine Drug-Linker Platform                                                    | cleavable     | breast cancer, stomach cancer                                                 | Topoisomerase 1 inhibitor | HER2               | 2021 |
| 61 | Preclinical Antitumor Activity and Biodistribution of a Novel Anti-GCC Antibody–Drug Conjugate in Patient-derived Xenografts                   | cleavable     | colorectal cancer, esophageal cancer, stomach cancer, pancreatic cancer       | IGN dimer                 | Guanylyl cyclase C | 2020 |
| 62 | LILRB4-targeting Antibody–Drug Conjugates for the Treatment of Acute Myeloid Leukemia                                                          | cleavable     | Acute myeloid leukemia                                                        | MMAF                      | LILRB4             | 2020 |
| 63 | A Novel Antibody-Drug Conjugate (ADC) Delivering a DNA Mono-Alkylating Payload to Chondroitin Sulfate Proteoglycan (CSPG4)-Expressing Melanoma | cleavable     | melanoma                                                                      | Pyrridinobenzodiazepine   | CSPG4              | 2020 |
| 64 | Targeting Multiple EGFR-expressing Tumors with a Highly Potent Tumor-selective Antibody–Drug Conjugate                                         | cleavable     | small cell lung cancer, head and neck cancer, colon cancer, pancreatic cancer | PBD dimer                 | EGFR               | 2020 |
| 65 | Depatuxizumab Mafodotin (ABT-414)-induced Glioblastoma Cell Death Requires EGFR Overexpression, but not EGFR Y1068 Phosphorylation             | non-cleavable | glioblastoma                                                                  | MMAF                      | EGFR               | 2020 |
| 66 | Antibody-Drug Conjugate Using Ionized Cys-Linker-MMAE as the Potent Payload Shows Optimal Therapeutic Safety                                   | non-cleavable | breast cancer                                                                 | MMAE                      | HER2               | 2020 |
| 67 | On the use of DNA as a linker                                                                                                                  | cleavable     | breast cancer                                                                 | MMAE                      | HER2               | 2020 |

|    |                                                                                                                                 |           |                                                                                      |                           |       |      |
|----|---------------------------------------------------------------------------------------------------------------------------------|-----------|--------------------------------------------------------------------------------------|---------------------------|-------|------|
|    | in antibody-drug conjugates: synthesis, stability and in vitro potency                                                          |           |                                                                                      |                           |       |      |
| 68 | TR1801-ADC: a highly potent cMet antibody-drug conjugate with high activity in patient-derived xenograft models of solid tumors | cleavable | stomach cancer, colorectal cancer, head and neck cancer                              | Pyrrolobenzodiazepine     | c-Met | 2019 |
| 69 | A HER2-Targeting Antibody–Drug Conjugate, Trastuzumab Deruxtecan (DS-8201a), Enhances Antitumor Immunity in a Mouse Model       | cleavable | breast cancer, stomach cancer, esophageal cancer, colorectal cancer, salivary cancer | Topoisomerase 1 inhibitor | HER2  | 2018 |
| 70 | Preparation of an Ultrahigh-DAR PDL1 monoclonal antibody-polymeric-SN38 conjugate for precise colon cancer therapy              | cleavable | colorectal cancer                                                                    | SN-38                     | PD-L1 | 2023 |
| 71 | Preclinical Efficacy of the Antibody–Drug Conjugate CLDN6–23-ADC for the Treatment of CLDN6-Positive Solid Tumors               | cleavable | ovarian cancer                                                                       | CLDN6                     | MMAE  | 2023 |

**Table S2. List of ADC clinical trials**

| No. | Clinical Trials                                                                                                                                                                                                           | ADC / Linker / Payload | Antigen | Phase | Year |
|-----|---------------------------------------------------------------------------------------------------------------------------------------------------------------------------------------------------------------------------|------------------------|---------|-------|------|
| 1   | A Phase I, Open-label, Multi-center, First in Human, Dose Escalation and Expansion Study to Assess the Safety, Tolerability, Efficacy and Pharmacokinetics of MRG002 in Patients With HER2 Positive Advanced Solid Tumors | MRG002/Val-Cit/MMAE    | HER2    | 1     | 2018 |
| 2   | A Randomized, Controlled, Multi-center                                                                                                                                                                                    | RC48-ADC/Val-Cit/MMAE  | HER2    | 2,3   | 2018 |



|   |                                                                                                                                                                                                                                                                                                                                                                                                                                                             |                                                      |      |     |      |
|---|-------------------------------------------------------------------------------------------------------------------------------------------------------------------------------------------------------------------------------------------------------------------------------------------------------------------------------------------------------------------------------------------------------------------------------------------------------------|------------------------------------------------------|------|-----|------|
|   | Phase II Clinical Study to Evaluate the Efficacy and Safety of Recombinant Humanized Anti-HER2 Monoclonal Antibody-MMAE Conjugate for Injection in the Treatment of HER2-positive Locally Advanced or Metastatic Breast Cancer and Phase III Clinical Study to Evaluate the Efficacy and Safety of Recombinant Humanized Anti-HER2 Monoclonal Antibody-MMAE Conjugate for Injection in the Treatment of HER2-positive Advanced Breast With Liver Metastases |                                                      |      |     |      |
| 3 | A PHASE 3, MULTICENTER, RANDOMIZED, OPEN-LABEL, ACTIVE-CONTROLLED TRIAL OF DS-8201A, AN ANTI-HER2-ANTIBODY DRUG CONJUGATE (ADC), VERSUS TREATMENT OF PHYSICIAN'S CHOICE FOR HER2-LOW, UNRESECTABLE AND/OR METASTATIC BREAST CANCER SUBJECTS                                                                                                                                                                                                                 | DS-8201/Tetrapeptide-based/Topoisomerase I inhibitor | HER2 | 3   | 2019 |
| 4 | A Phase I, Open-label, Dose Escalation Clinical Trial to Assess the Safety, Efficacy, Tolerability and Pharmacokinetics of the Recombinant Humanized Anti-PD1 Monoclonal Antibody (JS001) in Combination With Recombinant Humanized Anti-HER2 Monoclonal Antibody-MMAE Conjugate (RC48-ADC) in Treatment of HER2-Positive Advanced Malignant Solid Tumors                                                                                                   | RC48-ADC/Val-Cit/MMAE                                | HER2 | 1   | 2020 |
| 5 | A Phase 1b/2 Multicenter, Open-label, Dose-escalation and Dose expansion Study to Evaluate the Safety, Tolerability, Pharmacokinetics, Immunogenicity, and Antitumor Activity of Trastuzumab Deruxtec..                                                                                                                                                                                                                                                     | DS-1062/Tetrapeptide-based/Topoisomerase I inhibitor | HER2 | 1,2 | 2020 |
| 6 | A Phase 2, Multicenter, Open-label Study to Evaluate the Efficacy and Safety of Trastuzumab Deruxtec (T-DXd, DS-8201a) for the Treatment of Selected HER2 Expressing Tumors (DESTINY-PanTumor02)                                                                                                                                                                                                                                                            | DS-8201/Tetrapeptide-based/Topoisomerase I inhibitor | HER2 | 2   | 2020 |
| 7 | An Open-label, Single-arm, Multi-center, Phase II Study of RC48-ADC in Subjects With HER2 Overexpressed Locally Advanced or Metastatic Biliary Tract Cancer (BTC) Who Have Failed First-line Chemotherapy                                                                                                                                                                                                                                                   | RC48-ADC/Val-Cit/MMAE                                | HER2 | 2   | 2020 |
| 8 | Randomized, Controlled, Multicenter Phase III Clinical Study Evaluating the Efficacy and Safety of RC48-ADC for the Treatment of Locally Advanced or Metastatic Breast Cancer With Low Expression of HER2                                                                                                                                                                                                                                                   | RC48-ADC/Val-Cit/MMAE                                | HER2 | 3   | 2020 |
| 9 | Safety and unique pharmacokinetic profile                                                                                                                                                                                                                                                                                                                                                                                                                   | ARX788/pAcF/MMAF                                     | HER2 | 1   | 2021 |

|    |                                                                                                                                                                                                                                                                                 |                       |      |     |      |
|----|---------------------------------------------------------------------------------------------------------------------------------------------------------------------------------------------------------------------------------------------------------------------------------|-----------------------|------|-----|------|
|    | of ARX788, a site-specific ADC, in heavily pretreated patients with HER2-overexpressing solid tumors: Results from two phase 1 clinical trials.                                                                                                                                 |                       |      |     |      |
| 10 | An Open-Label, Multi-center Phase I/II Dose Escalation and Expansion Study to Assess the Safety, Efficacy and Pharmacokinetics of MRG002 in Patients With HER2-Positive Advanced Solid Tumors and Locally Advanced or Metastatic Gastric/Gastroesophageal Junction (GEJ) Cancer | MRG002/Val-Cit/MMAE   | HER2 | 1,2 | 2021 |
| 11 | A Single-arm, Single-center, Open Phase IIa Clinical Study of RC48-ADC in the Treatment of HER2-positive Advanced Melanoma                                                                                                                                                      | RC48-ADC/Val-Cit/MMAE | HER2 | 2   | 2021 |
| 12 | An Open, Multi-cohort, Multi-center Phase II Basket Clinical Study of RC48-ADC Monotherapy in the Treatment of HER2-expressing (HER2-positive and HER2 Low Expression) Gynecological Malignancies                                                                               | RC48-ADC/Val-Cit/MMAE | HER2 | 2   | 2021 |
| 13 | A Clinical Study of RC48-ADC Combined With Triplizumab as Neoadjuvant Therapy Before Radical Resection of Myometrial Invasive Bladder Cancer                                                                                                                                    | RC48-ADC/Val-Cit/MMAE | HER2 | 2   | 2021 |
| 14 | Antibody-Drug Conjugate Combined With Hypofractionated Radiotherapy, PD-1/PD-L1 Inhibitor Sequential GM-CSF and IL-2 for the Treatment Advanced Refractory Solid Tumors With HER-2 Positive (PRaG3.0)                                                                           | RC48-ADC/Val-Cit/MMAE | HER2 | 2   | 2021 |
| 15 | Phase II Clinical Study to Evaluate the Efficacy and Safety of Recombinant Humanized Anti-HER2 Monoclonal Antibody-MMAE Coupling Agent (RC48-ADC) for Neoadjuvant Treatment of Breast Cancer With Positive HER2 Expression (Seraph)                                             | RC48-ADC/Val-Cit/MMAE | HER2 | 2   | 2021 |
| 16 | An Open-label, Single-arm, Multi-center, Phase II Clinical Study of MRG002 in the Treatment of Patients With HER2-positive Unresectable Locally Advanced or Metastatic Urothelium Cancer                                                                                        | MRG002/Val-Cit/MMAE   | HER2 | 2   | 2021 |
| 17 | An Open-label, Single-arm, Multi-center, Phase II Clinical Study of MRG002 in the Treatment of Patients With HER2-positive Unresectable, Locally Advanced or Metastatic Biliary Tract Cancer                                                                                    | MRG002/Val-Cit/MMAE   | HER2 | 2   | 2021 |
| 18 | A Multicenter, Non-randomized, Open-label Phase II Clinical Study to Evaluate the Efficacy and Safety of MRG002 in the                                                                                                                                                          | MRG002/Val-Cit/MMAE   | HER2 | 2   | 2021 |

|    |                                                                                                                                                                                                                                        |                                                      |      |      |      |
|----|----------------------------------------------------------------------------------------------------------------------------------------------------------------------------------------------------------------------------------------|------------------------------------------------------|------|------|------|
|    | Treatment of Patients With HER2-low Locally Advanced or Metastatic Breast Cancer (BC)                                                                                                                                                  |                                                      |      |      |      |
| 19 | An Open-label, Multi-center, Non-randomized Phase II Clinical Study to Evaluate the Efficacy and Safety of MRG002 in Patients With HER2-mutated Unresectable/Metastatic Non-small Cell Lung Cancer (NSCLC).                            | MRG002/Val-Cit/MMAE                                  | HER2 | 2    | 2021 |
| 20 | A Phase 2, Multicenter, Randomized, Study of Trastuzumab Deruxtecan in Subjects with HER2-overexpressing Locally Advanced, Unresectable or Metastatic Colorectal Cancer (DESTINY-CRC02)                                                | DS-8201/Tetrapeptide-based/Topoisomerase I inhibitor | HER2 | 2    | 2021 |
| 21 | A Phase 2, multicenter, randomized study of trastuzumab deruxtecan in subjects with HER2-mutated metastatic Non-Small Cell Lung Cancer (NSCLC) [DESTINY-Lung02]                                                                        | DS-8201/Tetrapeptide-based/Topoisomerase I inhibitor | HER2 | 2    | 2021 |
| 22 | A Study of MRG002 in the Treatment of Patients With HER2-positive Unresectable Locally Advanced or Metastatic Breast Cancer                                                                                                            | MRG002/Val-Cit/MMAE                                  | HER2 | 2,3  | 2021 |
| 23 | Randomized, Controlled, Multicenter Phase III Clinical Study Evaluating the Efficacy and Safety of RC48-ADC for the Treatment of Locally Advanced or Metastatic Gastric Cancer With HER2-overexpression                                | RC48-ADC/Val-Cit/MMAE                                | HER2 | 3    | 2021 |
| 24 | A RANDOMIZED, MULTICENTER, DOUBLEBLIND, PLACEBO-CONTROLLED PHASE III STUDY OF THE EFFICACY AND SAFETY OF TRASTUZUMAB EMTANSINE IN COMBINATION WITH ATEZOLIZUMAB OR PLACEBO IN PATIENTS WITH HER2-POSITIVE...                           | T-DM1/SMCC/DM1                                       | HER2 | 3    | 2021 |
| 25 | Phase III Study of Trastuzumab Deruxtecan (T-DXd) with or without Pertuzumab versus Taxane, Trastuzumab and Pertuzumab in HER2-positive, First-line Metastatic Breast Cancer (DESTINY-Breast09)                                        | DS-8201/Tetrapeptide-based/Topoisomerase I inhibitor | HER2 | 3    | 2021 |
| 26 | A Phase 3 Open-label Trial of Neoadjuvant Trastuzumab Deruxtecan (TDXd) Monotherapy or T-DXd followed by THP Compared to ddAC-THP in Participants with High-risk HER2-positive Early-stage Breast Cancer...                            | DS-8201/Tetrapeptide-based/Topoisomerase I inhibitor | HER2 | 3    | 2021 |
| 27 | An Open-Label, Multinational, Multicenter, Phase 3b/4 Study of Trastuzumab Deruxtecan in Patients With or Without Baseline Brain Metastasis With Previously Treated Advanced/Metastatic HER2-Positive Breast Cancer (DESTINY-Breast12) | DS-8201/Tetrapeptide-based/Topoisomerase I inhibitor | HER2 | 3b/4 | 2021 |

|    |                                                                                                                                                                                                                                                                  |                                               |      |     |      |
|----|------------------------------------------------------------------------------------------------------------------------------------------------------------------------------------------------------------------------------------------------------------------|-----------------------------------------------|------|-----|------|
| 28 | A Phase I Study to Evaluate the Safety, Tolerability, Pharmacokinetics and Efficacy of FDA022-BB05 in Subjects With Advanced Solid Malignant Tumors                                                                                                              | FDA022-BB05/Unknown/Topoisomerase I inhibitor | HER2 | 1   | 2022 |
| 29 | 460MO Preliminary results from a phase I study using the bispecific, human epidermal growth factor 2 (HER2)-targeting antibody-drug conjugate (ADC) zanidatamab zovodotin (ZW49) in solid cancers                                                                | ZW49/Val-Cit/N-acyl sulfonamide auristatin    | HER2 | 1   | 2022 |
| 30 | A Multicenter, Open Label , Single Arm , Phase Ib/II Study to Evaluate the Effect and Safety of RC48-ADC Combined With S-1 for First-line Treatment of Advanced Gastroesophageal Adenocarcinoma With Moderate Expression of HER2                                 | RC48-ADC/Val-Cit/MMAE                         | HER2 | 1,2 | 2022 |
| 31 | An Open-label, Multi-center, Phase I/II Dose Escalation and Expansion Study to Evaluate the Safety, Tolerability, Pharmacokinetics and Preliminary Efficacy of MRG002 in Combination With HX008 in Patients With HER2-expressed Advanced Malignant Solid Tumors. | MRG002/Val-Cit/MMAE                           | HER2 | 1,2 | 2022 |
| 32 | A Phase 1/2, First-in-Human, Open-Label, Dose-Escalation and Expansion Study of IMGC936-0901 (Anti-ADAM9 Antibody Drug Conjugate) in Patients with Advanced Solid Tumors                                                                                         | IMGC936/Tripeptide linker/DM21                | HER2 | 1,2 | 2022 |
| 33 | RC48-ADC in Combination With Envolizumab for the First-line Treatment of Locally Advanced or Metastatic Biliary Tract Cancer With Positive HER-2: A Prospective, Single-arm Phase II Trial.                                                                      | RC48-ADC/Val-Cit/MMAE                         | HER2 | 2   | 2022 |
| 34 | An Open-label, Single-arm Study to Evaluate the Efficacy and Safety of RC48-ADC Combined With JS001 in Postoperative Adjuvant Treatment of HER2-positive Upper Tract Urothelial Carcinoma (UTUC)                                                                 | RC48-ADC/Val-Cit/MMAE                         | HER2 | 2   | 2022 |
| 35 | A Multicenter, Single Arm Phase II Clinical Study Evaluating the Efficacy and Safety of RC48-ADC for the Treatment of HER2-expression Metastatic Breast Cancer With Abnormal Activation of PAM Pathway                                                           | RC48-ADC/Val-Cit/MMAE                         | HER2 | 2   | 2022 |
| 36 | An Open-label, Single-arm, Multi-center, Phase II Study to Evaluate the Efficacy and Safety of RC48-ADC Combined With JS001 in Perioperative Treatment of Muscle-Invasive Bladder Cancer                                                                         | RC48-ADC/Val-Cit/MMAE                         | HER2 | 2   | 2022 |
| 37 | An Open-label, Single-arm, Multicenter Phase II Clinical Study : Evaluating RC48-                                                                                                                                                                                | RC48-ADC/Val-Cit/MMAE                         | HER2 | 2   | 2022 |

|    |                                                                                                                                                                                                                                                                                     |                       |      |   |      |
|----|-------------------------------------------------------------------------------------------------------------------------------------------------------------------------------------------------------------------------------------------------------------------------------------|-----------------------|------|---|------|
|    | ADC Combined With Triplizumab in the Neoadjuvant Treatment of Her2-positive Muscle-invasive Bladder Cancer                                                                                                                                                                          |                       |      |   |      |
| 38 | Phase II Clinical Study to Assess the Efficacy and Safety of Recombinant Humanized Anti-HER2 Monoclonal Antibody MMAE Coupling Agent in Treating Patients With Locally Advanced or Metastatic Salivary Gland Tumors Expressing HER2                                                 | RC48-ADC/Val-Cit/MMAE | HER2 | 2 | 2022 |
| 39 | An Open-label, Multi-center, Single-arm Phase II Clinical Study to Evaluate the Efficacy and Safety of MRG002 in Advanced HER-2 Positive Breast Cancer Patients Previously Treated With Trastuzumab and TKIs (Magic-009)                                                            | MRG002/Val-Cit/MMAE   | HER2 | 2 | 2022 |
| 40 | A Phase 2 Multi-Cohort, Open-Label, Multi-Center Clinical Study Evaluating the Efficacy and Safety of Disitamab Vedotin (RC48-ADC) Alone or in Combination With Pembrolizumab in Subjects With Locally-Advanced Unresectable or Metastatic Urothelial Carcinoma That Expresses HER2 | RC48-ADC/Val-Cit/MMAE | HER2 | 2 | 2022 |
| 41 | Disitamab Vedotin Combined With Tislelizumab, Low-dose Capecitabine and Celecoxib as Salvage Therapy for HER2-positive Metastatic Colorectal Cancer: a Phase II Trial (DETECT)                                                                                                      | RC48-ADC/Val-Cit/MMAE | HER2 | 2 | 2022 |
| 42 | A Single-arm, Open Clinical Trial of Efficacy and Safety of Tislelizumab in Combination With Disitamab-vedotin as Neoadjuvant Therapy for HER2-positive High-risk Upper Tract Urothelial Carcinoma (UTUC)                                                                           | RC48-ADC/Val-Cit/MMAE | HER2 | 2 | 2022 |
| 43 | An Open-label, Multi-center, Phase II Clinical Study to Evaluate the Safety, Efficacy and Pharmacokinetics of MRG002 in Patients With HER2-positive/HER2-low Locally Advanced or Metastatic Gastric/ Gastroesophageal Junction Cancer.                                              | MRG002/Val-Cit/MMAE   | HER2 | 2 | 2022 |
| 44 | A Single-arm, Prospective, Open-label Clinical Study of Tislelizumab Combined With DisitamabVedotin and Pyrotinib Maleate in HER2-positive or Mutated Advanced Colorectal Cancer Who Failed Standard Therapy                                                                        | RC48-ADC/Val-Cit/MMAE | HER2 | 2 | 2022 |
| 45 | A Global, Phase 2 Study of ARX788 in HER2-positive Metastatic Breast Cancer Patients Whose Disease is Resistant or Refractory to T-DM1, and/or T-DXd, and/or Tucatinib-containing Regimens                                                                                          | ARX788/pAcF/MMAF      | HER2 | 2 | 2022 |

|    |                                                                                                                                                                                                                                                 |                                 |      |     |      |
|----|-------------------------------------------------------------------------------------------------------------------------------------------------------------------------------------------------------------------------------------------------|---------------------------------|------|-----|------|
| 46 | A PHASE 2 MULTI COHORT, OPEN LABEL, MULTI CENTER CLINICAL STUDY EVALUATING THE EFFICACY AND SAFETY OF DISITAMAB VEDOTIN (RC48 ADC) IN SUBJECTS WITH HER2 EXPRESSING LOCALLY ADVANCED UNRESECTABLE OR METASTATIC UROTHELIAL CARCINOMA            | RC48-ADC/Val-Cit/MMAE           | HER2 | 2   | 2022 |
| 47 | A multiple center, open-label, single-arm, phase II clinical trial of MRG002, an HER2-targeted antibody-drug conjugate, in patients with HER2-low expressing advanced or metastatic breast cancer.                                              | MRG002/Val-Cit/MMAE             | HER2 | 2   | 2022 |
| 48 | A Open-Label, Multicenter, Randomised, Controlled Phase 3 Study of RC48-ADC Plus Toripalimab Versus Chemotherapy Alone in Previously Untreated Unresectable Locally Advanced or Metastatic Urothelial Carcinoma With HER2-Expressing            | RC48-ADC/Val-Cit/MMAE           | HER2 | 3   | 2022 |
| 49 | A Single-arm, Open, Multicenter Phase I Study to Evaluate the Safety, Tolerability, Pharmacokinetic Profile, and Efficacy of the KM501 Double-antibody ADC in Subjects With Advanced Solid Tumors That Express, Amplify, or Mutate HER2         | KM501/Unknown/Unknown           | HER2 | 1   | 2023 |
| 50 | A Phase 1 Dose Escalation Trial to Determine the Safety, Tolerance, Maximum Tolerated Dose, and Preliminary Antineoplastic Activity of IKS014, a HER2-Targeting Antibody Drug Conjugate (ADC), in Participants With Advanced HER2+ Solid Tumors | IKS014/Glucuronide-trigger/MMAF | HER2 | 1   | 2023 |
| 51 | Evaluate the Safety, Tolerability, Pharmacokinetic Characteristics, and Preliminary Efficacy of Disitamab Vedotin Intravenously Combined With Radiotherapy in the Treatment of Locally Advanced Solid Tumors With HER2 Expression Phase 1 Study | RC48-ADC/Val-Cit/MMAE           | HER2 | 1   | 2023 |
| 52 | An Open-label, Single-center, Phase Ib/II Study to Evaluate the Safety, Efficacy and Pharmacokinetics of RC48-ADC Combined With Pyrotinib in Local Advanced or Metastasis NSCLC With HER2 Mutation                                              | RC48-ADC/Val-Cit/MMAE           | HER2 | 1,2 | 2023 |
| 53 | RC48-ADC Combined With Bevacizumab in HER2-positive Advanced Colorectal Cancer : a Single-arm, Non-randomized, Single-center Trial                                                                                                              | RC48-ADC/Val-Cit/MMAE           | HER2 | 2   | 2023 |
| 54 | Prospective, Open, Single-center Clinical Study of the Combination of RC48 and Tislelizumab for Renal Preservation in High-                                                                                                                     | RC48-ADC/Val-Cit/MMAE           | HER2 | 2   | 2023 |

|    |                                                                                                                                                                                                                                      |                                                      |      |   |      |
|----|--------------------------------------------------------------------------------------------------------------------------------------------------------------------------------------------------------------------------------------|------------------------------------------------------|------|---|------|
|    | risk Upper Urinary Tract Uroepithelial Carcinoma Patients                                                                                                                                                                            |                                                      |      |   |      |
| 55 | Efficacy and Safety of Disitamab Vedotin Combined With Sintilimab in Second-line Treatment of Advanced Gastric Cancer: a Prospective, Single Arm Clinical Study (DVES)                                                               | RC48-ADC/Val-Cit/MMAE                                | HER2 | 2 | 2023 |
| 56 | A single-arm, open-label, phase II study investigating anti-HER2 ADC plus anti-PD-1 antibody in patients with unresectable locally advanced or metastatic BTC with HER2 overexpression.                                              | RC48-ADC/Val-Cit/MMAE                                | HER2 | 2 | 2023 |
| 57 | An Open-label, Single Arm, Single Center Phase 2 Study of RC48-ADC (IV) in Combination With Gemcitabine(Intravesical) in High Risk NMIBC Subjects (BCG Naïve or BCG Unresponsive) That Expresses HER2 (IHC 1+ and Greater)           | RC48-ADC/Val-Cit/MMAE                                | HER2 | 2 | 2023 |
| 58 | An Open, Single Arm, Single Center Phase II Clinical Study Evaluating the Efficacy and Safety of RC48-ADC in the Treatment of Metastatic Castration Resistant Prostate Cancer (mCRPC) Progression After Novel Endocrine Therapy      | RC48-ADC/Val-Cit/MMAE                                | HER2 | 2 | 2023 |
| 59 | RC48 Combined With PD-1 and Radiotherapy as Bladdersparing Therapy in Patients With Muscular Infiltrating Bladder Uroepithelial Carcinoma With Limited HER-2 Expression Following Maximum Electrical Resection or Partial Cystectomy | RC48-ADC/Val-Cit/MMAE                                | HER2 | 2 | 2023 |
| 60 | A Multicenter Phase II Study of RC48-ADC in Adjuvant/Salvage Treatment of HER2 Positive High-risk Non-muscle-invasive Bladder Cancer                                                                                                 | RC48-ADC/Val-Cit/MMAE                                | HER2 | 2 | 2023 |
| 61 | NeoAdjuvant Dynamic marker - Adjusted Personalized Therapy comparing trastuzumab-deruxtecan versus paclitaxel/docetaxel+carboplatin+trastuzumab+pertuzumab in HER2+ early breast cancer                                              | DS-8201/Tetrapeptide-based/Topoisomerase I inhibitor | HER2 | 2 | 2023 |
| 62 | KADCYLA AND NERATINIB FOR INTERCEPTION OF HER2+ BREAST CANCER WITH MOLECULAR RESIDUAL DISEASE                                                                                                                                        | T-DM1/SMCC/DM1                                       | HER2 | 2 | 2023 |
| 63 | Disitamab Vedotin or Endocrine Therapy for Patients With Metastatic Breast Cancer With Hormone Receptor-positive and HER2-low-expression                                                                                             | RC48-ADC/Val-Cit/MMAE                                | HER2 | 3 | 2023 |
| 64 | An Open-label, Randomized, Multi-center, Phase III Clinical Study of MRG002 Versus Investigator's Choice of Chemotherapy in                                                                                                          | MRG002/Val-Cit/MMAE                                  | HER2 | 3 | 2023 |

|    |                                                                                                                                                                                                                                                                                     |                                                      |        |                |      |
|----|-------------------------------------------------------------------------------------------------------------------------------------------------------------------------------------------------------------------------------------------------------------------------------------|------------------------------------------------------|--------|----------------|------|
|    | the Treatment of Patients With HER2-positive Unresectable Locally Advanced or Metastatic Urothelial Cancer Previously Treated With Platinum-based Chemotherapy and PD-1/PD-L1 Inhibitors                                                                                            |                                                      |        |                |      |
| 65 | A Phase 3b, Multicenter, Global, Interventional, Open-label Study of Trastuzumab Deruxtecan (T-DXd), an Anti-HER2-Antibody Drug Conjugate (ADC), in Subjects Who Have Unresectable and/or Metastatic HER2-low or HER2 Immunohistochemistry (IHC) 0 Breast Cancer (DESTINY-Breast15) | DS-8201/tetrapeptide-based/topoisomerase I inhibitor | HER2   | 3              | 2023 |
| 66 | A Study of RC48-ADC Combine With Toripalimab and Chemotherapy or RC48-ADC Combine With Toripalimab and Herceptin as First-line Treatment in Local Advanced or Metastatic Gastric Cancer With the HER2 Expression                                                                    | RC48-ADC/Val-Cit/MMAE                                | HER2   | 3              | 2023 |
| 67 | Disitamab Vedotin (RC48-ADC) in Patients With HER2-low Advanced Breast Cancer                                                                                                                                                                                                       | RC48-ADC/Val-Cit/MMAE                                | HER2   | Not Applicable | 2023 |
| 68 | Disitamab Vedotin (RC48-ADC) in Patients With Breast Cancer: a Real World Study                                                                                                                                                                                                     | RC48-ADC/Val-Cit/MMAE                                | HER2   | Observational  | 2023 |
| 69 | A Phase I-II, First-in-Human Study of SKB264 in Patients With Locally Advanced Unresectable /Metastatic Solid Tumors Who Are Refractory to Available Standard Therapies                                                                                                             | SKB264/sulfo-SPDB/topoisomerase I inhibitor          | TROP-2 | 1,2            | 2020 |
| 70 | A Phase I Study to Evaluate the Safety, Tolerability, Pharmacokinetics and Efficacy of FDA018-ADC in Patients With Advanced Solid Tumors                                                                                                                                            | FDA018/Unknown/Unknown                               | TROP-2 | 1              | 2021 |
| 71 | Phase 2, Open Label Study of DS-1062a, an Anti-TROP-2-Antibody-Drug Conjugate (ADC), in Patients With Advanced and/or Unresectable Non-Small Cell Lung Cancer (NSCLC), With Biomarker Analysis to Characterize Response to Therapy                                                  | DS-1062/Tetrapeptide-based/Topoisomerase I inhibitor | TROP-2 | 2              | 2021 |
| 72 | TROPION-PanTumor01: Dose analysis of the TROP2-directed antibody-drug conjugate (ADC) DS-1062 (Dato-DXd, DS-1062) for the treatment (Tx) of advanced or metastatic non-small cell lung cancer (NSCLC).                                                                              | DS-1062/Tetrapeptide-based/Topoisomerase I inhibitor | TROP-2 | 3              | 2021 |
| 73 | A Phase II, Multicentre, Open-label, Master Protocol to Evaluate the Efficacy and Safety of DS-1062 (Dato-DXd) as Monotherapy and in Combination With Anticancer Agents in                                                                                                          | DS-1062/Tetrapeptide-based/Topoisomerase I inhibitor | TROP-2 | 2              | 2022 |



|    |                                                                                                                                                                                                                                                                                                                                                           |                                                      |        |   |      |
|----|-----------------------------------------------------------------------------------------------------------------------------------------------------------------------------------------------------------------------------------------------------------------------------------------------------------------------------------------------------------|------------------------------------------------------|--------|---|------|
|    | Patients With Advanced/Metastatic Solid Tumours (TROPION-PanTumor03)                                                                                                                                                                                                                                                                                      |                                                      |        |   |      |
| 74 | A Phase 3 Open-label, Randomised Study of DS-1062 (DatoDXd) With or Without Durvalumab Versus Investigator's Choice of Therapy in Patients With Stage I-III Triple-negative Breast Cancer Who Have Residual Invasive Disease in the Breast and/or Axillary Lymph Nodes at Surgical Resection Following Neoadjuvant Systemic Therapy (TROPION-Breast03)    | DS-1062/Tetrapeptide-based/Topoisomerase I inhibitor | TROP-2 | 3 | 2022 |
| 75 | A Phase 3, Open-label, Randomised Study of DS-1062 (Dato-DXd) Versus Investigator's Choice of Chemotherapy in Patients Who Are Not Candidates for PD-1/PD-L1 Inhibitor Therapy in First-line Locally Recurrent Inoperable or Metastatic Triple-negative Breast Cancer (TROPION Breast02)                                                                  | DS-1062/Tetrapeptide-based/Topoisomerase I inhibitor | TROP-2 | 3 | 2022 |
| 76 | A Phase III, Randomised, Open-label, Multicentre, Global Study of DS-1062 (Dato-DXd) in Combination With Durvalumab and Carboplatin Versus Pembrolizumab in Combination With Platinum-based Chemotherapy for the First-line Treatment of Patients With Locally Advanced or Metastatic NSCLC Without Actionable Genomic Alterations (D926NC00001; AVANZAR) | DS-1062/Tetrapeptide-based/Topoisomerase I inhibitor | TROP-2 | 3 | 2022 |
| 77 | A Phase 3, Open-label, Randomized Study of Dato-DXd Versus Investigator's Choice of Chemotherapy in Participants With Inoperable or Metastatic Hormone Receptor-Positive, HER2-Negative Breast Cancer...                                                                                                                                                  | DS-1062/Tetrapeptide-based/Topoisomerase I inhibitor | TROP-2 | 3 | 2022 |
| 78 | A Phase 1/2 Study to Evaluate the Safety, Tolerability, and Efficacy of TROP2-Directed Antibody-Drug Conjugate LCB84, as a Single Agent and in Combination With an Anti-PD-1 Ab, in Patients With Advanced Solid Tumors                                                                                                                                   | DS-1062/Tetrapeptide-based/Topoisomerase I inhibitor | TROP-2 | 2 | 2023 |
| 79 | An Open-label, Multicenter, Phase 3 Randomized, Active-Comparator-Controlled Clinical Study of Pembrolizumab (MK-3475) in Combination With Sacituzumab Govitecan Versus MK-3475 Monotherapy as First-line Treatment in Participants With PD L1 TPS Greater Than or Equal to 50% Metastatic Non-small Cell Lung Cancer (KEYNOTE D46/EVOKE-03)              | IMMU-132/SMCC/Topoisomerase I inhibitor              | TROP-2 | 3 | 2023 |

|    |                                                                                                                                                                                                                                                                                                                                                                                                      |                                           |             |     |      |
|----|------------------------------------------------------------------------------------------------------------------------------------------------------------------------------------------------------------------------------------------------------------------------------------------------------------------------------------------------------------------------------------------------------|-------------------------------------------|-------------|-----|------|
| 80 | A Phase 1 Open-Label, Safety, Pharmacokinetic and Preliminary Efficacy Study of STRO-002, an Anti-Folate Receptor Alpha (FolR $\alpha$ ) Antibody-Drug Conjugate (ADC), in Patients With Advanced Epithelial Ovarian Cancer (Including Fallopian Tube or Primary Peritoneal Cancers) and Endometrial Cancers                                                                                         | STRO-002/Val-Cit/Hemiasterlin             | FR $\alpha$ | 1   | 2019 |
| 81 | A Multicenter, Open-Label Phase 1/2 Trial Evaluating the Safety, Tolerability, and Efficacy of MORAb-202, a Folate Receptor Alpha (FR $\alpha$ )-Targeting Antibody-drug Conjugate (ADC) in Subjects With Selected Tumor Types                                                                                                                                                                       | MORAb-202/Val-Cit/Eribulin                | FR $\alpha$ | 1,2 | 2020 |
| 82 | MIRASOL (GOG 3045/ENGOT OV-55): A randomized, open-label, phase III study of mirvetuximab soravtansine versus investigator's choice of chemotherapy in advanced high-grade epithelial ovarian, primary peritoneal, or fallopian tube cancers with high folate-alpha (FR $\alpha$ ) expression.                                                                                                       | IMGN-853/sulfo-SPDB/Maytansinoid DM4      | FR $\alpha$ | 3   | 2020 |
| 83 | Randomized, Multicenter, Open-label, Phase 3 Study of Mirvetuximab Soravtansine in Combination With Bevacizumab Versus Bevacizumab Alone as Maintenance Therapy for Patients With FR $\alpha$ -high Recurrent Platinum-sensitive Epithelial Ovarian, Fallopian Tube, or Primary Peritoneal Cancers Who Have Not Progressed After Second Line Platinum-based Chemotherapy Plus Bevacizumab (GLORIOSA) | IMGN-853/sulfo-SPDB/Maytansinoid DM4      | FR $\alpha$ | 3   | 2022 |
| 84 | FONTANA: A Modular Phase I/IIa, Open-label, Multi-center Study to Assess the Safety, Tolerability, Pharmacokinetics, and Preliminary Efficacy of Ascending Doses of AZD5335 Monotherapy and in Combination With Anti-cancer Agents in Participants With Solid Tumors                                                                                                                                 | AZD5335/Unknown/Topoisomerase I inhibitor | FR $\alpha$ | 1,2 | 2023 |
| 85 | A Phase 2 Open-label Randomized Study of Farletuzumab Ecteribulin (MORAb-202), a Folate Receptor Alpha-targeting Antibody-drug Conjugate, Versus Investigator's Choice Chemotherapy in Women With Platinum-resistant High-grade Serous (HGS) Ovarian, Primary Peritoneal, or Fallopian Tube Cancer                                                                                                   | MORAb-202/Val-Cit/Eribulin                | FR $\alpha$ | 2   | 2023 |
| 86 | A Phase 2 Open-label Randomized Study of MORAb-202 (Farletuzumab Ecteribulin), a Folate Receptor Alpha-targeting Antibody-Drug Conjugate, in Participants with                                                                                                                                                                                                                                       | MORAb-202/Val-Cit/Eribulin                | FR $\alpha$ | 2   | 2023 |

|    |                                                                                                                                                                                                                                                                    |                                            |             |     |      |
|----|--------------------------------------------------------------------------------------------------------------------------------------------------------------------------------------------------------------------------------------------------------------------|--------------------------------------------|-------------|-----|------|
|    | Metastatic Non-Small Cell Lung Cancer ...                                                                                                                                                                                                                          |                                            |             |     |      |
| 87 | A Phase 2 Open-label Randomized Study of Farletuzumab Ecteribulin (MORAb-202), a Folate Receptor Alpha-targeting Antibody-Drug Conjugate, versus Investigator's Choice Chemotherapy in Women with Pla...                                                           | MORAb-202/Val-Cit/Eribulin                 | FR $\alpha$ | 2   | 2023 |
| 88 | An Open-label, Single-arm, Multi-center, Phase II Clinical Study of MRG003 in the Treatment of Patients With EGFR-positive Unresectable, Locally Advanced or Metastatic Biliary Tract Cancer                                                                       | MRG003/Val-Cit/MMAE                        | EGFR        | 2   | 2021 |
| 89 | A Phase II Clinical Study to Evaluate the Efficacy and Safety of MRG003 in EGFR-Positive, HER2-Negative Advanced Gastric Cancer.                                                                                                                                   | MRG003/Val-Cit/MMAE                        | EGFR        | 2   | 2021 |
| 90 | An Open-Label, Multi-Center Phase II Clinical Study to Evaluate the Efficacy and Safety of MRG003 in Patients With Recurrent Metastatic Nasopharyngeal Carcinoma                                                                                                   | MRG003/Val-Cit/MMAE                        | EGFR        | 2   | 2021 |
| 91 | A Phase I/II First-in-human, Open Label, Multicenter, Dose Escalation and Cohort Expansion Study to Investigate the Safety, Tolerability, Pharmacokinetics and Preliminary Antitumor Activity of BB-1705 in Patients With Locally Advanced/Metastatic Solid Tumors | BB-1705/Val-Cit/Eribulin                   | EGFR        | 1,2 | 2022 |
| 92 | An Open-label, Multi-center, Phase I/II Dose Escalation and Expansion Study to Evaluate the Safety, Tolerability, Pharmacokinetics and Efficacy of MRG003 in Combination With HX008 in Patients With EGFR-positive Advanced Solid Tumors                           | MRG003/Val-Cit/MMAE                        | EGFR        | 1,2 | 2022 |
| 93 | BL-B01D1, a first-in-class EGFRxHER3 bispecific antibody-drug conjugate (ADC), in patients with locally advanced or metastatic solid tumor: Results from a first-in-human phase 1 study.                                                                           | BL-B01D1/Val-Cit/Topoisomerase I inhibitor | EGFR        | 1   | 2023 |
| 94 | A Randomized, Open-Label, Multicenter, Phase III Study to Evaluate MRG003 vs Cetuximab/Methotrexate as Second/Third Line of Treatment in Patient With Recurrent or Metastatic Squamous Cell Carcinoma of the Head and Neck (RM-SCCHN)                              | MRG003/Val-Cit/MMAE                        | EGFR        | 3   | 2023 |
| 95 | A Phase I Study to Evaluate the Safety, Pharmacokinetics, and Effect of RC108-ADC For Injection in Subjects With c-Met Positive Advanced Malignant Solid Tumors                                                                                                    | RC108/Unknown/Unknown                      | c-MET       | 1   | 2021 |
| 96 | A First-in-human Dose-escalation and Expansion Trial With the Antibody-drug                                                                                                                                                                                        | BYON3521/Val-Cit/Duocarmacin               | c-MET       | 1   | 2022 |

|     |                                                                                                                                                                                                                                                 |                                                      |          |     |      |
|-----|-------------------------------------------------------------------------------------------------------------------------------------------------------------------------------------------------------------------------------------------------|------------------------------------------------------|----------|-----|------|
|     | Conjugate BYON3521 to Evaluate the Safety, Pharmacokinetics and Efficacy in Patients With c-MET Expressing Locally Advanced or Metastatic Solid Tumours                                                                                         |                                                      |          |     |      |
| 97  | A Study to Evaluate the Efficacy, Safety and Pharmacokinetics of RC108 for Injection in the Treatment of Patients With c-Met-positive Advanced Digestive System Malignant Tumor                                                                 | RC108/Unknown/Unknown                                | c-MET    | 2   | 2022 |
| 98  | A Phase 1 Multicenter Dose Escalation and Dose Expansion Study of Antibody-Drug Conjugate MYTX-011 in Subjects With Non-Small Cell Lung Cancer - KisMET-01                                                                                      | MYTX-011/Val-Cit/MMAE                                | c-MET    | 1   | 2023 |
| 99  | A Dose-Escalation and Expansion Study of the Safety and Pharmacokinetics of XB002 as Single-Agent and Combination Therapy in Subjects With Inoperable Locally Advanced or Metastatic Solid Tumors                                               | XB002/Val-Cit/MMAE                                   | TF       | 1   | 2021 |
| 100 | An Open-Label, Multi-center, Phase I/II Dose Escalation and Expansion Study to Assess the Safety, Tolerability, Anti-Tumor Activity and Pharmacokinetics of MRG004A in Patients With Tissue Factor Positive Advanced or Metastatic Solid Tumors | MRG004A/Unknown/Unknown                              | TF       | 1,2 | 2021 |
| 101 | A Randomized, Open-Label, Phase 3 Trial of Tisotumab Vedotin Versus Investigator's Choice Chemotherapy in Second- or Third-Line Recurrent or Metastatic Cervical Cancer                                                                         | TIVDAK/Val-Cit/MMAE                                  | TF       | 3   | 2021 |
| 102 | SWOG S1826: A Phase III, Randomized Study of Nivolumab Plus AVD or Brentuximab Vedotin Plus AVD in Patients with Newly Diagnosed Advanced Stage Classical Hodgkin Lymphoma                                                                      | SGN35/Val-Cit/MMAE                                   | TNFRSF8  | 3   | 2021 |
| 103 | Brentuximab vedotin in combination with lenalidomide and rituximab in subjects with relapsed or refractory diffuse large B-cell lymphoma (DLBCL) (Trials in Progress).                                                                          | SGN35/Val-Cit/MMAE                                   | TNFRSF8  | 3   | 2021 |
| 104 | 798TiP Study EV-302: A 3-arm, open-label, randomized phase III study of enfortumab vedotin plus pembrolizumab and/or chemotherapy, versus chemotherapy alone, in untreated locally advanced or metastatic urothelial cancer                     | ASG-22ME/Val-Cit/MMAE                                | Nectin-4 | 3   | 2020 |
| 105 | Nectin-4 Targeting ADC Probe for PET Imaging in Solid Tumors                                                                                                                                                                                    | PADCEV/Val-Cit/MMAE                                  | Nectin-4 | x   | 2023 |
| 106 | Phase 2, Open Label Study of Patritumab Deruxtecan (U3-1402), an Anti-HER3-Antibody Drug Conjugate (ADC), in Patients With Advanced Breast Cancer, With                                                                                         | U3-1402/Tetrapeptide-based/Topoisomerase I inhibitor | HER3     | 2   | 2021 |

|     |                                                                                                                                                                                                                                                                                                                                       |                                                      |         |     |      |
|-----|---------------------------------------------------------------------------------------------------------------------------------------------------------------------------------------------------------------------------------------------------------------------------------------------------------------------------------------|------------------------------------------------------|---------|-----|------|
|     | Biomarker Analyses to Characterize Response to Therapy                                                                                                                                                                                                                                                                                |                                                      |         |     |      |
| 107 | Results from the phase 1/2 study of patritumab deruxtecan, a HER3-directed antibody-drug conjugate (ADC), in patients with HER3-expressing metastatic breast cancer (MBC).                                                                                                                                                            | U3-1402/Tetrapeptide-based/Topoisomerase I inhibitor | HER3    | 1,2 | 2022 |
| 108 | A Phase 1b, Multicenter, Two-Part, Open-Label Study of Trastuzumab Deruxtecan (DS-8201a), An Anti-Human Epidermal Growth Factor Receptor-2 (HER2)-Antibody Drug Conjugate (ADC), In Combination With Pembrolizumab, An Anti-PD-1 Antibody, For Subjects With Locally Advanced/Metastatic Breast Or Non-Small Cell Lung Cancer (NSCLC) | DS-8201/Tetrapeptide-based/Topoisomerase I inhibitor | ERBB2   | 1   | 2020 |
| 109 | Antitumor Activity and Safety of Trastuzumab Deruxtecan in Patients With HER2-Low-Expressing Advanced Breast Cancer: Results From a Phase Ib Study                                                                                                                                                                                    | DS-8201/Tetrapeptide-based/Topoisomerase I inhibitor | ERBB2   | 1   | 2020 |
| 110 | Phase III trial comparing antibody-drug conjugate (ADC) SAR408701 with docetaxel in patients with metastatic non-squamous non-small cell lung cancer (NSQ NSCLC) failing chemotherapy and immunotherapy.                                                                                                                              | SAR408701/SPDB/Maytansinoid DM4                      | CEACAM5 | 3   | 2020 |
| 111 | A Phase I, Multicenter, Open-Label First in Human Study of Anti-CEACAM5 Antibody Drug Conjugate M9140 in Participants With Advanced Solid Tumors                                                                                                                                                                                      | M9140/Unknown/Topoisomerase I inhibitor              | CEACAM5 | 1   | 2022 |
| 112 | A Phase 1/ 2 Safety and Efficacy Dose Escalation / Dose Expansion Study of a CAB-AXL-ADC, Alone and in Combination With a PD-1 Inhibitor in Adult Patients With Advanced Solid Tumors (Phase 1) and Adult and Adolescent Patients With Advanced, Refractory Sarcoma (Phase 2)                                                         | CAB-AXL-ADC/Val-Cit/MMAE                             | AXL     | 1,2 | 2018 |
| 113 | A Phase 2 Study of BA3011 Alone and in Combination With PD-1 Inhibitor in Adult Patients With Metastatic Non-small Cell Lung Cancer (NSCLC) Who Had Prior Disease Progression on a PD-1/L-1 Inhibitor                                                                                                                                 | CAB-AXL-ADC/Val-Cit/MMAE                             | AXL     | 2   | 2021 |
| 114 | A Phase 1/2 Safety and Efficacy Dose Escalation / Dose Expansion Study of a CAB-ROR2-ADC, Alone and in Combination With a PD-1 Inhibitor, in Patients With Advanced Solid Tumors (Ph1) and Melanoma and NSCLC Patients (Ph2)                                                                                                          | CAB-ROR2-ADC/Val-Cit/MMAE                            | Ror2    | 1,2 | 2018 |
| 115 | A Dose-Escalation Study to Evaluate the Safety, Tolerability, Pharmacokinetics, and                                                                                                                                                                                                                                                   | F0002-ADC/SMCC/Maytansinoid-DM1                      | CD30    | 1   | 2019 |

|     |                                                                                                                                                                                                                                                                                  |                                           |            |     |      |
|-----|----------------------------------------------------------------------------------------------------------------------------------------------------------------------------------------------------------------------------------------------------------------------------------|-------------------------------------------|------------|-----|------|
|     | Efficacy of F0002-ADC in Chinese Patients With Refractory or Recurrent CD30+ Hematologic Malignancies.                                                                                                                                                                           |                                           |            |     |      |
| 116 | A Phase I, Open-label, Dose Finding Study to Assess the Safety, Tolerability, PK, and Preliminary Efficacy of OBT076, a CD205-directed ADC, in Recurrent and/or Metastatic CD205+ Solid Tumors                                                                                   | OBT076/SPDP/Maytansinoid-DM4              | CD205      | 1   | 2019 |
| 117 | An Open-label, Multicenter, First-in-human, Phase I Dose-escalation and Expansion Clinical Study to Assess the Safety, Tolerability, Pharmacokinetics and Preliminary Efficacy of MRG001 in Patients With CD20-positive Relapsed or Refractory B-cell Non-Hodgkin Lymphoma (NHL) | MRG001/Val-Cit/MMAE                       | CD20       | 1   | 2019 |
| 118 | A Phase 1/2, Open-Label, Dose-Escalation and Cohort-Expansion Study Evaluating the Safety, Pharmacokinetics, and Therapeutic Activity of OBI-999 in Patients With Advanced Solid Tumors                                                                                          | OBI-999/Unknown/MMAE                      | Globo H    | 1,2 | 2019 |
| 119 | A phase I/II study of IMG632, a novel CD123-targeting antibody-drug conjugate, in patients with relapsed/refractory acute myeloid leukemia, blastic plasmacytoid dendritic cell neoplasm, and other CD123-positive hematologic malignancies.                                     | IMG632/Val-Cit/IGN                        | CD123      | 1,2 | 2020 |
| 120 | To Evaluate the Safety of RC88 for Injection in Patients With Advanced Malignant Solid Tumors, Multicenter, Open, Multi-cohort Extension of Efficacy and Pharmacokinetic Characteristics Phase I /IIa Clinical Study                                                             | RC88/Val-Cit/MMAE                         | Mesothelin | 1,2 | 2020 |
| 121 | A phase II trial to assess the activity of Gemtuzumab Ozogamicin Therapy in Haemophagocytic lymphohistiocytosis (HLH) or Macrophage activation syndrome (MAS) or relapsed/refractory solid tumours                                                                               | Gemtuzumab Ozogamicin/AcBut/Calicheamicin | CD33       | 2   | 2020 |
| 122 | Sgnlv-005: Open-label, phase II study of ladiratuzumab vedotin (LV) for advanced aerodigestive tract malignancies.                                                                                                                                                               | SGN-LIV1A/Val-Cit/MMAE                    | LIV1       | 2   | 2020 |
| 123 | Preliminary Results of a Phase 1 Dose Escalation Study of the First-in-Class Anti-CD74 Antibody Drug Conjugate (ADC), STRO-001, in Patients with Advanced B-Cell Malignancies                                                                                                    | STRO-001/DBCO/Maytansinoid                | CD74       | 1   | 2021 |
| 124 | A Phase 1/2, Multicenter, Open-label, Dose-escalation, and Dose-expansion Study to Evaluate the Safety, Pharmacokinetics, and Anti-tumor Activity of ARX517, With Randomized Comparison to Investigator's                                                                        | ARX517/Unknown/MMAF                       | PSMA       | 1,2 | 2021 |

|     |                                                                                                                                                                                                                                                                                              |                                      |           |   |      |
|-----|----------------------------------------------------------------------------------------------------------------------------------------------------------------------------------------------------------------------------------------------------------------------------------------------|--------------------------------------|-----------|---|------|
|     | Choice of Treatment, in Subjects With Metastatic Castration-resistant Prostate Cancer Who Are Resistant or Refractory to Prior Standard Therapies                                                                                                                                            |                                      |           |   |      |
| 125 | ARTEMIS-001: A Phase 1, Open-label, Multi-center Study to Evaluate Safety, Tolerability, Pharmacokinetics, and Efficacy of Multiple Doses of Intravenous Administration of HS-20093 in Patients With Locally Advanced or Metastatic Solid Tumors Who Have Progressed Following Prior Therapy | HS-20093/Unknown/Unknown             | B7-H3     | 1 | 2021 |
| 126 | A Phase 1, First in Human, Dose-Escalation Study of TORL-2-307-ADC in Participants With Advanced Cancer                                                                                                                                                                                      | TORL-2-307-ADC/Unknown/MMAE          | CLDN 18.2 | 1 | 2022 |
| 127 | A Phase I, Open-label, Multicenter Study to Evaluate Safety, Tolerability, Pharmacokinetics, and Efficacy of HS-20089 in Patients With Advanced Solid Tumors                                                                                                                                 | HS-20089/Unknown/Unknown             | B7-H4     | 1 | 2022 |
| 128 | A Phase 3, Randomized, Double-blind, Placebo-controlled, Multicenter Study of Upifitamab Rilsodotin (XMT-1536) as Post-Platinum Maintenance Therapy for Participants With Recurrent, Platinum-Sensitive, Ovarian Cancer (UP-NEXT)                                                            | XMT-1536/Thioether bond/auristatin F | NaPi2b    | 3 | 2023 |
